# Supplementary material for: Secondary Structure of Subgenomic RNA M of SARS-CoV-2
Source: MDPI journal article supplement (doi:10.3390/v14020322), 2022-02-04
Supplement: s1 [file s1]

## **Supporting Information**

### **Secondary structure of subgenomic RNA M of SARS-CoV-2**

Marta Soszynska-Jozwiak<sup>1</sup>, Agnieszka Ruszkowska<sup>1</sup>, Ryszard, Kierzek<sup>1</sup>, Collin A. O’Leary<sup>2</sup>, Walter N. Moss<sup>2</sup>, Elzbieta Kierzek<sup>1\*</sup>

<sup>1</sup>Institute of Bioorganic Chemistry, Polish Academy of Sciences, Noskowskiego 12/14, 61-704 Poznan, Poland.

<sup>2</sup>Roy J. Carver Department of Biophysics, Biochemistry and Molecular Biology, Iowa State University, Ames, IA 50011, USA

\*Corresponding authors:

Elzbieta Kierzek, Institute of Bioorganic Chemistry Polish Academy of Sciences, 61-704 Poznan, Noskowskiego 12/14, Poland, E-mail: [elzbieta.kierzek@ibch.poznan.pl](mailto:elzbieta.kierzek@ibch.poznan.pl)

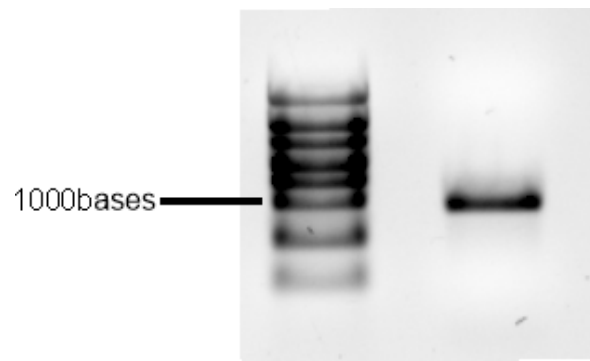

Figure S1. SgRNA M after folding by heating in 80°C for 5 min. in water and slowly cooled to 50°C. In 50°C buffer was added and slowly cooling to 37°C. Folding buffer: 300mM NaCl, 5mM MgCl<sub>2</sub>, 50mM HEPES, pH 7.5.

A.

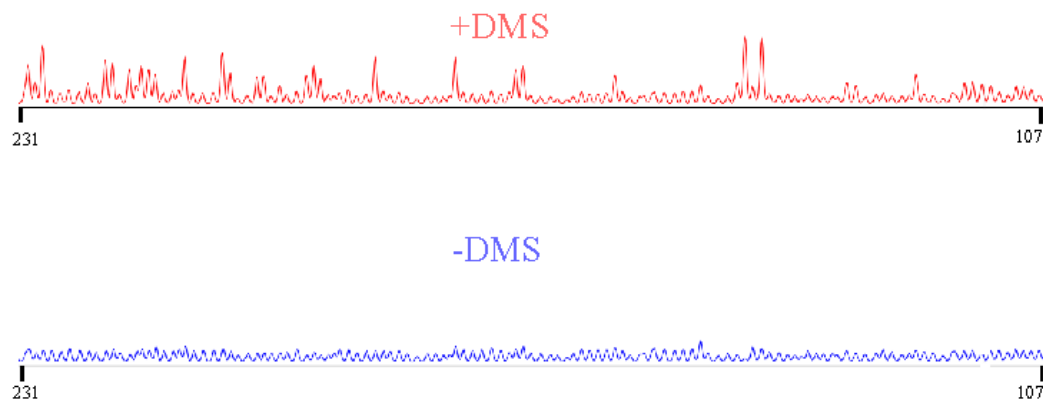

B.

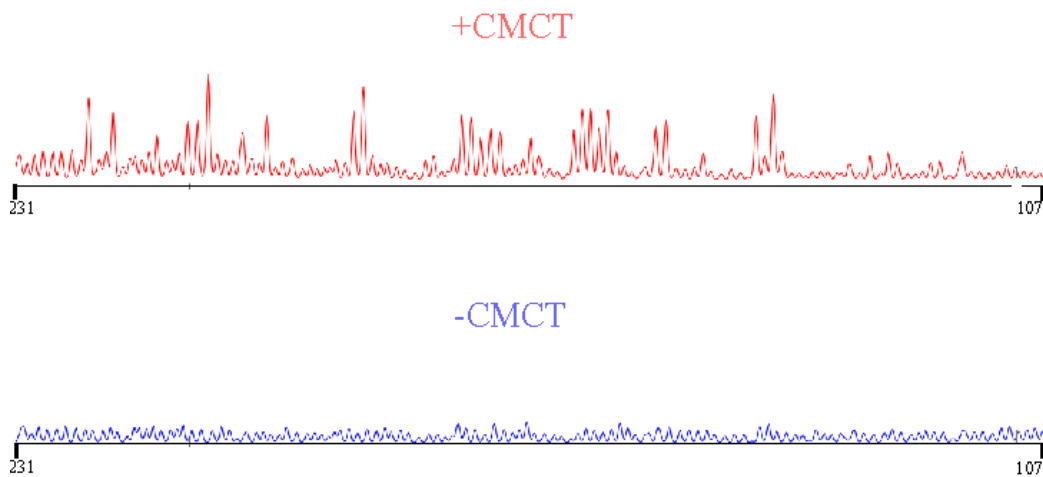

C.

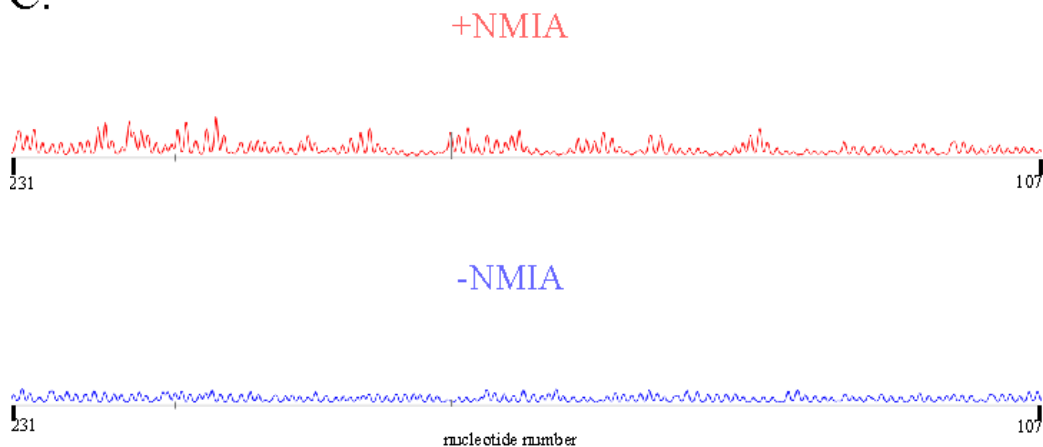

Figure S2. A-Example of capillary electrophoresis raw data for nucleotides 107-231 showing CMCT modified RNA (red line), unmodified control (blue line), B- Example of capillary electrophoresis raw data for nucleotides 107-231 showing DMS modified RNA (red line), unmodified control (blue line), C-Example of capillary electrophoresis raw data for nucleotides 107-231 showing NMIA modified RNA (red line), unmodified control (blue line).

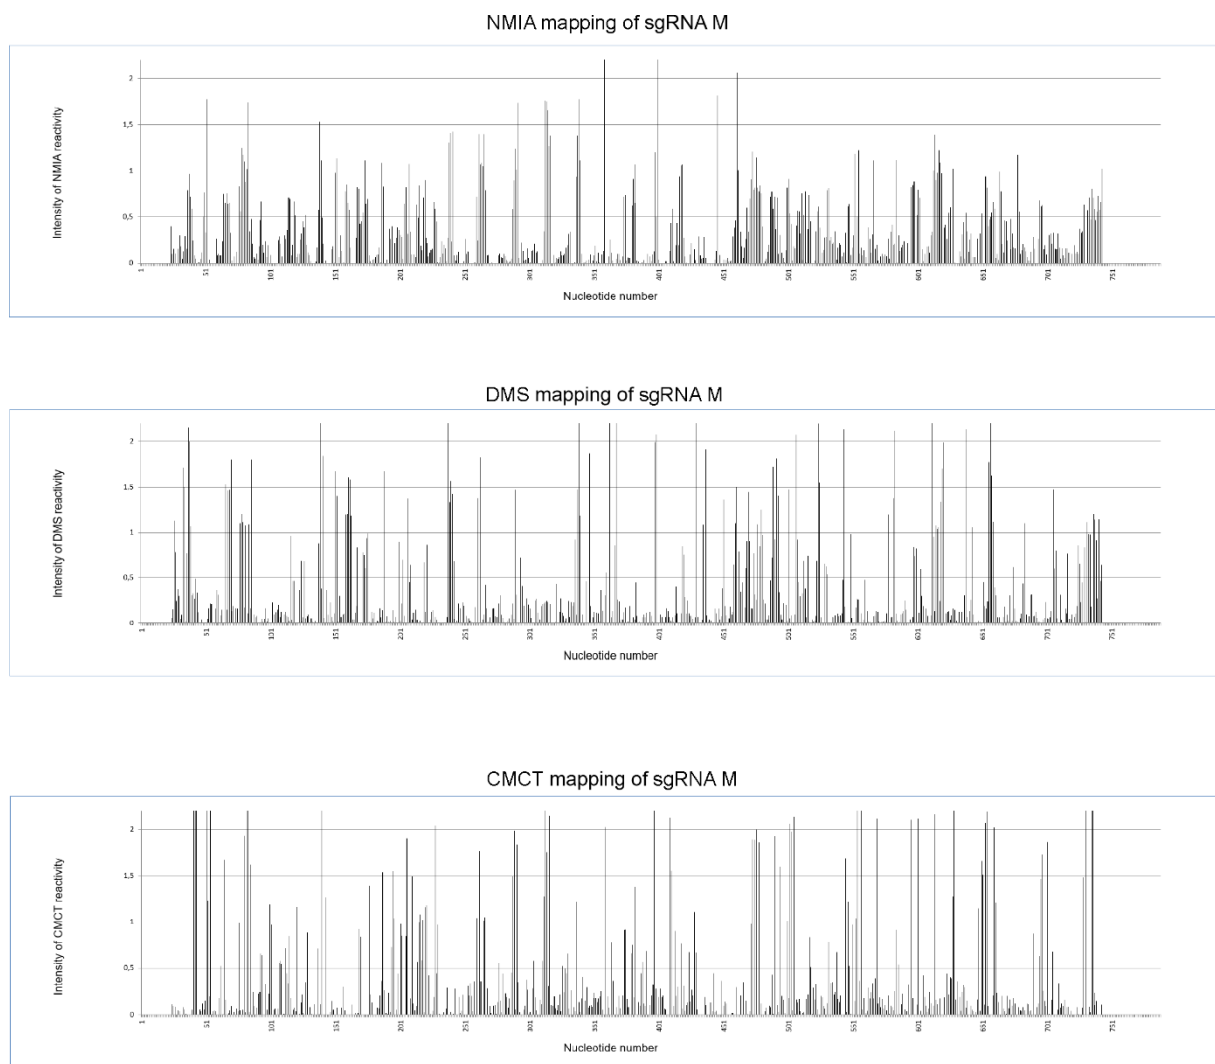

Figure S3. sgRNA M nucleotides reactivity diagrams. The sgRNA M chemical mapping experiments were performed at 37 °C with NMIA, DMS and CMCT.
